# Supplementary material for: Fuel-range liquid hydrocarbon products from catalytic deoxygenation of mixtures of fatty acids obtained from the hydrolysis of rapeseed oil
Source: Royal Society of Chemistry journal article supplement (doi:10.1039/d4se00864b), 2024-01-01
Supplement: d4se00864b1.pdf [file d4se00864b1.pdf]

**Supplementary Information for the manuscript entitled: Fuel-range liquid  
hydrocarbon products from simultaneous catalytic deoxygenation of mixtures  
of fatty acids obtained from the hydrolysis of rapeseed oil**

Morenike, A. Peters, Jude A. Onwudili\*, Jiawei Wang,  
*Energy and Bioproducts Research Institute, College of Engineering and Physical  
Sciences, Aston University, Aston Triangle, Birmingham B4 7ET, UK*

| With no catalyst                                                                  |                                                                                   |                                                                                   | With catalyst (Pt/C)                                                               |                                                                                     |
|-----------------------------------------------------------------------------------|-----------------------------------------------------------------------------------|-----------------------------------------------------------------------------------|------------------------------------------------------------------------------------|-------------------------------------------------------------------------------------|
| 350 °C                                                                            | 380 °C                                                                            | 400 °C                                                                            | 350 °C                                                                             | 400 °C                                                                              |
| 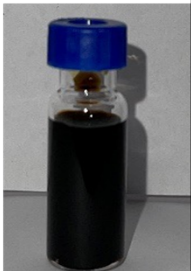 |  |  |  |  |

Figure S11: Appearance of oil/wax products obtained at different reaction temperatures for 1 h reaction time (with and without 5 wt% Pt/C catalyst).

Table SI1: List of compounds oil/wax products obtained at different reaction temperatures for 1 h reaction time (with and without 5 wt% Pt/C catalyst) (feed = 10 g)

| Alkanes                                | Yield (wt %) |        |        |         |         |
|----------------------------------------|--------------|--------|--------|---------|---------|
|                                        | 350 °C       | 380 °C | 400 °C | 350* °C | 400* °C |
| Heptane                                | -            | 0.91   | 1.65   | -       | -       |
| Cyclohexane, methyl-                   | -            | -      | -      | -       | -       |
| Cyclopentane, ethyl-                   | -            | -      | -      | -       | -       |
| Octane                                 | -            | 1.1    | 2.73   | -       | -       |
| Cyclohexane, ethyl-                    | -            | -      | -      | -       | -       |
| Nonane                                 | 0.16         | 1.14   | 3.27   | -       | -       |
| Decane                                 | 0.12         | 0.99   | 3.07   | -       | -       |
| Cyclopentane, butyl-                   | -            | -      | -      | -       | -       |
| Decane                                 | -            | -      | -      | -       | -       |
| Cyclohexane, butyl-                    | -            | 0.34   | -      | -       | -       |
| Cyclopentane, pentyl-                  | -            | -      | -      | -       | -       |
| Undecane                               | 0.14         | 1.18   | -      | -       | 0.3     |
| Cycloheptane, methyl-                  | -            | -      | 0.23   | -       | -       |
| Octane, 2,4,6-trimethyl-               | -            | -      | 2.71   | -       | -       |
| Cyclopentane, hexyl-                   | -            | -      | 0.22   | -       | -       |
| Cyclohexane, pentyl-                   | -            | -      | -      | -       | -       |
| Dodecane                               | 0.15         | 1.32   | 3      | -       | 0.57    |
| Cyclohexane, octyl-                    | -            | 0.16   | 0.26   | -       | -       |
| Cyclopentane, 1-butyl-2-propyl-        | -            | -      | 0.22   | -       | -       |
| Cyclohexane, hexyl-                    | -            | -      | -      | -       | -       |
| Tridecane                              | -            | 0.66   | 1.63   | -       | 0.73    |
| Cyclopentane, 1-hexyl-3-methyl-        | -            | -      | 0.61   | -       | -       |
| Tetradecane                            | -            | -      | 1.29   | -       | 0.86    |
| Dodecane, 2-cyclohexyl-                | -            | -      | 0.4    | -       | -       |
| Pentadecane                            | 1.6          | 0.48   | 6.32   | 5.38    | 5.86    |
| Cyclohexane, undecyl-                  | -            | -      | 0.49   | -       | -       |
| Hexadecane                             | -            | 4.88   | 1.13   | 0.57    | 1.19    |
| 2,6,10-Trimethyltridecane              | -            | -      | -      | -       | 1.73    |
| Decane, 2,5-dimethyl-                  | -            | -      | -      | -       | 0.65    |
| Cyclododecane                          | -            | 0.16   | -      | -       | -       |
| Cyclohexane, undecyl-                  | -            | 0.23   | -      | -       | -       |
| Cyclohexadecane                        | -            | 0.12   | -      | 1.02    | -       |
| Hexadecane                             | -            | 0.56   | -      | -       | -       |
| Decane, 4-cyclohexyl-                  | -            | 2.8    | 0.27   | -       | -       |
| Cyclohexane, 1,5-diethyl-2,3-dimethyl- | -            | -      | 0.66   | -       | -       |
| Cyclopentane, 1-pentyl-2-propyl-       | -            | -      | 1.05   | -       | 0.85    |
| Cyclopentane, 1-butyl-2-pentyl-        | -            | -      | 0.84   | -       | -       |
| Dodecane, 2-cyclohexyl-                | -            | -      | -      | -       | -       |
| Cyclohexane, nonadecyl-                | -            | -      | -      | -       | -       |
| 1-Cyclopentyleicosane                  | -            | -      | 1.13   | -       | -       |
| Pentadecane, 4-methyl-                 | 0.47         | -      | -      | -       | -       |
| Hexadecane, 2-methyl-                  | 1.14         | -      | -      | -       | 2.11    |

|                                               |             |              |              |              |              |
|-----------------------------------------------|-------------|--------------|--------------|--------------|--------------|
| Tetradecane, 5-methyl-                        | -           | -            | -            | -            | 0.54         |
| Tetradecane, 4-methyl-                        | -           | -            | -            | -            | 0.66         |
| Tetradecane, 3-methyl-                        | -           | -            | -            | -            | 1.4          |
| Heptadecane                                   | 2.64        | 11.96        | 12.64        | 76.13        | 63.49        |
| Cyclopentadecane                              | 0.55        | 1.43         | -            | -            | -            |
| Cyclohexane, undecyl-                         | 1.29        | 2.96         | 2.44         | -            | -            |
| Cyclopentane, decyl-                          | -           | 1.84         | -            | -            | -            |
| Octadecane                                    | 0.54        | 0.85         | -            | 2.08         | 1.53         |
| Cyclopentane, 1-hexyl-3-methyl-               | -           | -            | 1.13         | 0            | 0            |
| Cyclooctane, tetradecyl-                      | -           | -            | -            | -            | -            |
| 1,3-Dimethyl-(3,7-dimethyloctyl), cyclohexane | -           | 1.86         | -            | -            | -            |
| Heptadecane, 3-methyl-                        | -           | -            | -            | -            | -            |
| Nonadecane                                    | -           | -            | 0.41         | -            | 1.69         |
| Eicosane                                      | -           | 0.61         | 1.08         | -            | 0.47         |
| Heneicosane                                   | -           | 0.21         | 0.25         | -            | -            |
| Docosane                                      | -           | -            | 0.69         | -            | -            |
| Tricosane                                     | -           | -            | 0.25         | -            | -            |
| <b>Total</b>                                  | <b>7.19</b> | <b>36.75</b> | <b>52.08</b> | <b>51.68</b> | <b>84.61</b> |

| Alkenes                 | Yield (wt %) |              |             |             |             |
|-------------------------|--------------|--------------|-------------|-------------|-------------|
|                         | 350 °C       | 380 °C       | 400 °C      | 350* °C     | 400* °C     |
| 2-Heptene, (E)-         | -            | 0.25         | 0.33        | -           | -           |
| 2-Octene, (E)-          | -            | 0.2          | 0.27        | -           | -           |
| trans--4-Nonene         | -            | -            | 0.22        | -           | -           |
| 4-Nonene                | -            | -            | 0.37        | -           | -           |
| (Z)-5-Decene            | -            | -            | 0.4         | -           | -           |
| 2-Decene, (E)-          | -            | 0.19         | 0.23        | -           | -           |
| 4-Undecene, (E)-        | -            | 0.2          | 0.53        | -           | -           |
| 2-Undecene, (E)-        | -            | 0.24         | -           | -           | -           |
| 3-Dodecene, (Z)-        | -            | 0.16         | -           | -           | -           |
| 5-Tetradecene, (E)-     | -            | 0.16         | -           | -           | -           |
| 1-Hexadecene            | -            | 2.1          | -           | -           | -           |
| 8-Heptadecene           | -            | 1.57         | -           | 0.94        | 1.13        |
| 5-Octadecene, (E)-      | 0.13         | -            | -           | 1.27        | 0.57        |
| 9-Octadecene, (E)-      | -            | -            | -           | 3.67        | -           |
| 9-Eicosene, (E)-        | 1.77         | 5.04         | -           | -           | -           |
| 9-Eicosene, (E)-        | 5.44         | -            | -           | -           | -           |
| 5-Eicosene, (E)-        | 1.68         | -            | -           | -           | -           |
| 9-Eicosene, (E)-        | 0.81         | -            | -           | -           | -           |
| 5-Heptadecene, 1-methyl | 0.29         | -            | -           | -           | -           |
| Cyclohexene, 1-decyl-   | 0.22         | -            | -           | -           | -           |
| <b>Total</b>            | <b>10.32</b> | <b>10.13</b> | <b>2.35</b> | <b>3.57</b> | <b>1.69</b> |

| Aromatics         | Yield (wt %) |        |        |         |         |
|-------------------|--------------|--------|--------|---------|---------|
|                   | 350 °C       | 380 °C | 400 °C | 350* °C | 400* °C |
| Toluene           | -            | -      | 0.12   | -       | -       |
| 1-Phenyl-1-butene | -            | -      | 0.12   | -       | -       |

|                               |             |             |             |             |            |
|-------------------------------|-------------|-------------|-------------|-------------|------------|
| Benzene, hexyl-               | -           | -           | 0.17        | -           | -          |
| Benzene, heptyl-              | -           | -           | 0.31        | -           | -          |
| Benzene, (1-methyldecyl)-     | 0.12        | 0.13        | 0.2         | 3.41        | 3.07       |
| Benzene, undecyl-             | -           | 0.05        | 0.21        | 0.4         | 2.07       |
| Benzene, (1,1-dimethylnonyl)- | -           | -           | -           | 1           | 1.06       |
| <b>Total</b>                  | <b>0.12</b> | <b>0.18</b> | <b>1.13</b> | <b>4.81</b> | <b>6.2</b> |

| Oxygenates                                      | Yield (wt %) |             |             |             |          |
|-------------------------------------------------|--------------|-------------|-------------|-------------|----------|
|                                                 | 350 °C       | 380 °C      | 400 °C      | 350* °C     | 400* °C  |
| 2-Ethyl-oxetane                                 | -            | 0.18        | 0.39        | -           | -        |
| Octanoic acid                                   | -            | 0.25        | -           | -           | -        |
| Nonanoic acid                                   | 0.12         | 0.39        | -           | -           | -        |
| n-Decanoic acid                                 | 0.13         | 0.36        | -           | -           | -        |
| Undecanoic acid                                 | -            | 0.27        | -           | -           | -        |
| Acetic acid n-octadecyl ester                   | 0.36         | 1.36        | 1.78        | -           | -        |
| n-Nonadecanol-1                                 | 0.73         | 0           | 2.38        | -           | -        |
| (3-Methylphenyl) methanol, 2-methylpropyl ether | -            | 0.35        | -           | -           | -        |
| Carbonic acid, decyl undecyl ester              | 0.13         | 0.54        | 1.17        | -           | -        |
| Carbonic acid, octadecyl propyl ester           | 0.38         | -           | -           | -           | -        |
| Oxalic acid, butyl 1-menthyl ester              | 0.12         | 0.58        | -           | -           | -        |
| n-Heptadecanol-1                                | -            | 1.59        | -           | -           | -        |
| Oxalic acid, cyclohexylmethyl octyl ester       | 0.18         | 0.21        | -           | -           | -        |
| Oxalic acid, cyclohexylmethyl nonyl ester       | 0.13         | -           | -           | -           | -        |
| n-Pentadecanol                                  | 0.25         | -           | -           | -           | -        |
| (3-Methylphenyl) methanol, 2-methylpropyl ether | 0.2          | -           | -           | -           | -        |
| Pentadecanoic acid                              | 0.3          | -           | -           | -           | -        |
| 2-n-Heptylcyclopentanone                        | 0.14         | 0.26        | -           | -           | -        |
| Phenol, 4-undecyl-                              | -            | 0.31        | -           | -           | -        |
| Octadecanoic acid                               | 1.46         | 0.33        | -           | -           | -        |
| 2(3H)-Furanone, dihydro-5-tetradecyl-           | 0.46         | 0.23        | -           | 0.61        | -        |
| <b>Total</b>                                    | <b>6.93</b>  | <b>7.06</b> | <b>7.33</b> | <b>0.61</b> | <b>-</b> |

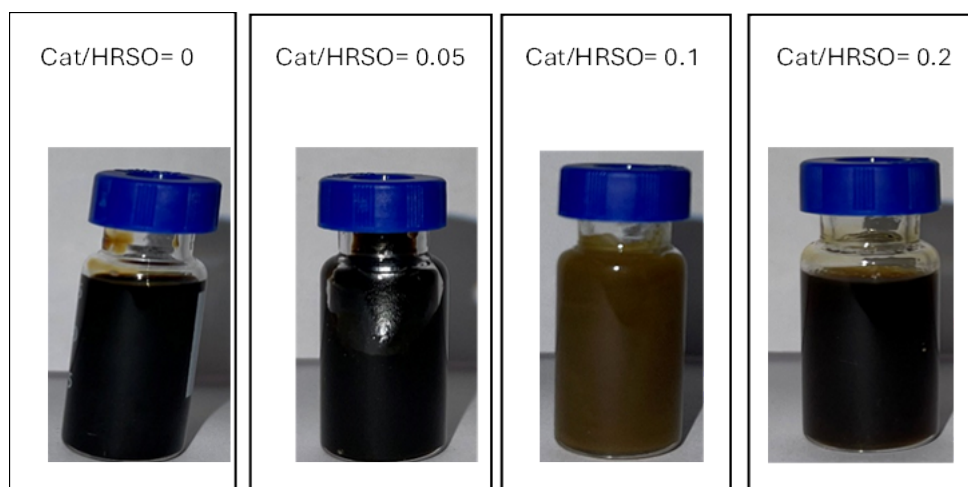

Figure S12: Appearance of oil/wax products obtained by varying 5 wt% Pt/C catalyst/HRSO mass ratios at 400 °C for 1 h reaction time

Table S12: List of compounds in the oil products oil/wax products obtained using different 5 wt% Pt/C catalyst/feed mass ratios (C/F)

| Alkanes                                | Yield (wt %) |            |           |           |
|----------------------------------------|--------------|------------|-----------|-----------|
|                                        | C/F = 0      | C/F = 0.05 | C/F = 0.1 | C/F = 0.2 |
| Heptane                                | 1.65         | -          | -         | -         |
| Octane                                 | 2.73         | -          | -         | -         |
| Nonane                                 | 3.27         | 0.57       | 0.14      | -         |
| Octane, 2,4,6-trimethyl-               | 3.07         | 0.81       | -         | -         |
| Decane                                 | -            | -          | 0.33      | -         |
| Undecane                               | -            | 1.08       | 0.50      | 0.30      |
| Cycloheptane, methyl-                  | 0.23         | -          | -         | -         |
| Octane, 2,4,6-trimethyl-               | 2.71         | -          | -         | -         |
| Cyclopentane, hexyl-                   | 0.22         | -          | -         | -         |
| Dodecane                               | 3.00         | 1.44       | 0.66      | 0.57      |
| Cyclohexane, octyl-                    | 0.26         | -          | -         | -         |
| Cyclopentane, 1-butyl-2-propyl-        | 0.22         | -          | -         | -         |
| Tridecane                              | 1.63         | 1.04       | 0.60      | 0.73      |
| Cyclopentane, 1-hexyl-3-methyl-        | 0.61         | -          | -         | -         |
| Tetradecane                            | 1.29         | 0.93       | 0.62      | 0.86      |
| Pentadecane                            | 6.32         | 4.75       | 4.00      | 5.86      |
| Dodecane, 2-cyclohexyl-                | 0.40         | -          | -         | -         |
| Pentadecane, 7-methyl-                 | -            | 0.37       | 0.46      | -         |
| Cyclohexane, undecyl-                  | 0.49         | 0.58       | -         | -         |
| Hexadecane                             | 1.13         | 1.05       | 0.76      | 1.19      |
| Cyclohexane, 1,5-diethyl-2,3-dimethyl- | -            | 0.18       | -         | -         |
| Cyclopentane, 1-pentyl-2-propyl-       | 1.05         | 0.57       | -         | 0.85      |
| 2,6,10-Trimethyltridecane              | -            | -          | -         | 1.73      |
| Decane, 2,5-dimethyl-                  | -            | -          | -         | 0.65      |
| Tetradecane, 5-methyl-                 | -            | -          | -         | 0.54      |
| Cyclohexane, 1,5-diethyl-2,3-dimethyl- | 0.66         | -          | -         | -         |
| Cyclopentane, decyl-                   | 0.27         | 0.39       | -         | -         |
| Heptane, 3-ethyl-2-methyl-             | -            | -          | 0.12      | -         |
| Tetradecane, 2,6,10-trimethyl-         | -            | -          | 0.11      | -         |
| Tetradecane, 4-methyl-                 | -            | -          | -         | 0.66      |
| Hexadecane, 2-methyl-                  | -            | -          | -         | 2.11      |
| Tetradecane, 3-methyl-                 | -            | -          | -         | 1.40      |
| Cyclopentane, 1-butyl-2-pentyl-        | 0.84         | -          | -         | -         |
| Heptadecane                            | 12.64        | 36.62      | 42.31     | 63.49     |
| Cyclopentane, 1-hexyl-3-methyl-        | 1.13         | -          | 0.27      | -         |
| Octadecane                             | -            | 0.36       | 0.30      | 1.53      |
| 1-Cyclopentyleicosane                  | 1.13         | -          | -         | -         |
| Cyclohexane, undecyl-                  | 2.44         | -          | -         | -         |
| Nonadecane                             | 0.41         | 1.34       | 1.34      | 1.69      |

|              |              |              |              |              |
|--------------|--------------|--------------|--------------|--------------|
| Eicosane     | 1.08         | 0.20         | 0.47         | 0.47         |
| Heneicosane  | 0.25         | 0.60         | 0.38         | -            |
| Docosane     | 0.69         | 0.19         | 0.36         | -            |
| Tricosane    | 0.25         | 0.19         | 5.09         | -            |
| <b>Total</b> | <b>52.08</b> | <b>53.29</b> | <b>58.81</b> | <b>84.61</b> |

| Alkenes             | Yield (wt %) |             |             |             |
|---------------------|--------------|-------------|-------------|-------------|
|                     | 0.00         | 0.05        | 0.10        | 0.20        |
| 2-Heptene, (E)-     | 0.33         | -           | -           | -           |
| 2-Octene, (E)-      | 0.27         | -           | -           | -           |
| trans--4-Nonene     | 0.22         | -           | -           | -           |
| 4-Nonene            | 0.37         | -           | -           | -           |
| (Z)-5-Decene        | 0.40         | -           | -           | -           |
| 2-Decene, (E)-      | 0.23         | -           | -           | -           |
| 4-Undecene, (E)-    | 0.53         | -           | -           | -           |
| 3-Hexadecene, (Z)-  | -            | 0.53        | -           | -           |
| 8-Heptadecene       | -            | 1.13        | 0.47        | 1.13        |
| 3-Heptadecene, (Z)- | -            | -           | 0.56        | -           |
| 5-Octadecene, (E)-  | -            | -           | -           | 0.57        |
| 9-Eicosene, (E)-    | -            | -           | 1.24        | -           |
| 5-Eicosene, (E)-    | -            | -           | 1.09        | -           |
| <b>Total</b>        | <b>2.35</b>  | <b>1.66</b> | <b>3.37</b> | <b>1.69</b> |

| Aromatics                                 | Yield, wt % |             |             |             |
|-------------------------------------------|-------------|-------------|-------------|-------------|
|                                           | 0.00        | 0.05        | 0.10        | 0.20        |
| Toluene                                   | 0.12        | -           | -           | -           |
| 1-Phenyl-1-butene                         | 0.12        | -           | -           | -           |
| Benzene, hexyl-                           | 0.17        | -           | -           | -           |
| Benzene, heptyl-                          | 0.31        | -           | -           | -           |
| Benzene, (1-methyldecyl)-                 | 0.20        | -           | -           | -           |
| Benzene, undecyl-                         | 0.21        | -           | -           | -           |
| Benzene, 1-ethyl-2-methyl-                | -           | 0.09        | -           | -           |
| Benzene, 1-methyl-2-propyl-               | -           | 0.12        | 0.06        | -           |
| Benzene, 1-methyl-4-butyl                 | -           | 0.11        | 0.07        | -           |
| Benzene, (1,3-dimethylbutyl)-             | -           | 0.11        | 0.17        | -           |
| 1-Methyl-2-n-hexylbenzene                 | -           | 0.14        | 0.08        | -           |
| Benzene, (1-methylheptyl)-                | -           | 0.11        | 0.08        | -           |
| Benzene, nonyl-                           | -           | 0.10        | -           | -           |
| Benzene, (1-methyldecyl)-                 | -           | 4.37        | 4.62        | 4.90        |
| Benzene, (1,1-dimethylnonyl)-             | -           | 0.90        | 0.90        | 0.83        |
| Benzene, undecyl-                         | -           | 0.57        | 0.47        | 0.47        |
| Benzene, 1,4-dimethyl-2-(2-methylpropyl)- | -           | 0.12        | 0.11        | -           |
| Benzene, (1-methylundecyl)-               | -           | -           | 0.09        | -           |
| Benzene, (2,3-dimethyldecyl)-             | -           | -           | 0.06        | -           |
| Benzene, dodecyl-                         | -           | 0.15        | -           | -           |
| Benzene, (1-methyldodecyl)-               | -           | 0.10        | -           | -           |
| <b>Total</b>                              | <b>1.13</b> | <b>7.21</b> | <b>6.69</b> | <b>6.20</b> |



| Oxygenated compounds                                                       | Yield, wt % |             |             |          |
|----------------------------------------------------------------------------|-------------|-------------|-------------|----------|
|                                                                            | 0.00        | 0.05        | 0.10        | 0.2      |
| 2-Ethyl-oxetane                                                            | 0.39        | -           | -           | -        |
| 1-Decanol, 2-octyl-                                                        | 1.78        | -           | 0.56        | -        |
| n-Nonadecanol-1                                                            | 2.38        | -           | -           | -        |
| (3-Methylphenyl) methanol, 2-methylpropyl ether                            | 0.35        | -           | -           | -        |
| 1,3-Dimethyl-(3,7-dimethyloctyl)cyclohexane                                | 0.99        | -           | -           | -        |
| 1,3-Dimethyl-(3,7-dimethyloctyl)cyclohexane                                | 0.87        | -           | -           | -        |
| Carbonic acid, decyl undecyl ester                                         | 0.57        | -           | -           | -        |
| 8-Octadecanone                                                             | -           | -           | 0.33        | -        |
| (3-Methylphenyl) methanol, 2-methylpropyl ether                            | -           | 0.21        | -           | -        |
| Androstane-3,17-diol, 17-methyl-, (3.alpha.,5.alpha.,17.beta.)-, 3-acetate | -           | 0.75        | 1.04        | -        |
| 1-Hexadecanol                                                              | -           | 0.80        | -           | -        |
| 9-Octadecanone                                                             | -           | 0.20        | -           | -        |
| Coprostane                                                                 | -           | 1.56        | -           | -        |
| 5.alpha.-Cholestane                                                        | -           | 3.43        | -           | -        |
| 10-Nonadecanone                                                            | -           | 0.26        | -           | -        |
| 1-Heptacosanol                                                             | -           | -           | 4.22        | -        |
| <b>Total</b>                                                               | <b>4.89</b> | <b>7.19</b> | <b>6.15</b> | <b>-</b> |

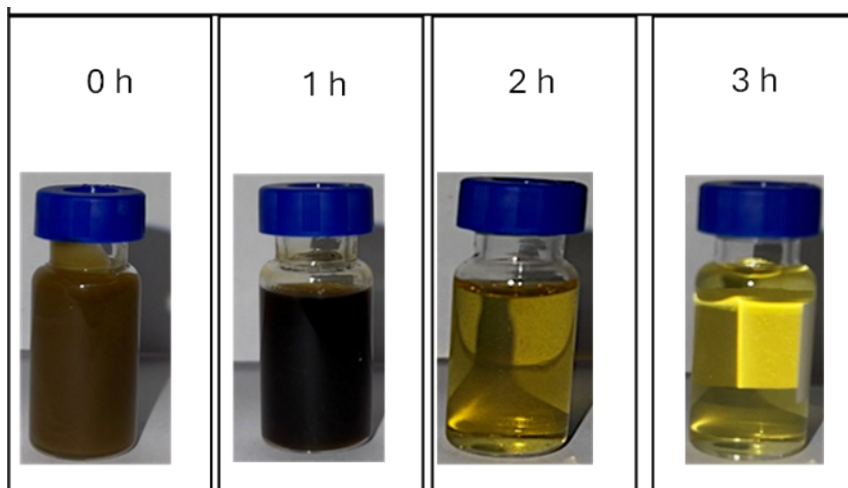

Figure S13: Appearance of oil/wax products obtained by varying reaction times at 400 °C at fixed 5 wt% Pt/C catalyst/HRSO mass ratio of 0.2

Table S13: List of compounds in oil/wax products obtained by varying reaction times at 400 °C at fixed 5 wt% Pt/C catalyst/HRSO mass ratio Of 0.2

| Alkanes                          | Yield (wt%) |              |              |              |
|----------------------------------|-------------|--------------|--------------|--------------|
|                                  | 0 h         | 1 h          | 2 h          | 3 h          |
| Hexane, 2-methyl-                | -           | -            | -            | 0.22         |
| Heptane                          | -           | -            | 1.22         | 1.26         |
| Octane                           | -           | -            | 1.27         | 1.36         |
| Nonane                           | -           | -            | 1.30         | 1.39         |
| Decane                           | -           | -            | 1.30         | 1.39         |
| Undecane                         | -           | 0.30         | 1.35         | 1.41         |
| Dodecane                         | -           | 0.57         | 1.39         | 1.42         |
| Tridecane                        | -           | 0.73         | 1.42         | 1.42         |
| Tetradecane                      | -           | 0.86         | 1.45         | 1.45         |
| Tetradecane, 2-methyl-           | -           | -            | -            | 0.28         |
| Pentadecane                      | 1.40        | 5.86         | 6.52         | 6.24         |
| Cyclohexadecane                  | 1.38        | -            | -            | -            |
| Hexadecane                       | -           | 1.19         | 1.43         | 1.48         |
| 2,6,10-Trimethyltridecane        | -           | 1.73         | 2.07         | 2.75         |
| Decane, 2,5-dimethyl-            | -           | 0.65         | 0.75         | 0.95         |
| Tetradecane, 4-methyl-           | -           | 0.54         | 0.72         | 1.17         |
| Tetradecane, 5-methyl-           | -           | 0.66         | 0.86         | -            |
| Hexadecane, 2-methyl-            | -           | 2.11         | 2.84         | 3.27         |
| Tetradecane, 3-methyl-           | -           | 1.40         | 1.76         | 2.17         |
| Heptadecane                      | 4.90        | 63.49        | 60.63        | 56.25        |
| Cyclopentane, 1-pentyl-2-propyl- | -           | 0.85         | -            | -            |
| Cyclopentane, decyl-             | -           | -            | 0.26         | -            |
| Octadecane                       | -           | 1.53         | 1.81         | 1.60         |
| Nonadecane                       | 0.76        | 1.69         | 1.54         | 1.49         |
| Eicosane                         | -           | 0.47         | 0.41         | 0.38         |
| <b>Total</b>                     | <b>8.44</b> | <b>84.61</b> | <b>92.36</b> | <b>93.09</b> |

| Alkenes            | Yield, wt%  |             |          |          |
|--------------------|-------------|-------------|----------|----------|
|                    | 0 h         | 1 h         | 2 h      | 3 h      |
| 8-Heptadecene      | -           | 1.13        | -        | -        |
| 9-Octadecene, (E)- | 1.81        | -           | -        | -        |
| 5-Octadecene, (E)- | 0.75        | 0.56        | -        | -        |
| 5-Eicosene, (E)-   | 0.41        | -           | -        | -        |
| <b>Total</b>       | <b>2.97</b> | <b>1.69</b> | <b>-</b> | <b>-</b> |

| Aromatics                   | Yield (wt%) |     |     |      |
|-----------------------------|-------------|-----|-----|------|
|                             | 0 h         | 1 h | 2 h | 3 h  |
| o-Xylene                    | -           | -   | -   | 0.15 |
| Benzene, 1-ethyl-3-methyl-  | -           | -   | -   | 0.21 |
| Benzene, 1-methyl-2-propyl- | -           | -   | -   | 0.16 |

|                               |             |             |             |             |
|-------------------------------|-------------|-------------|-------------|-------------|
| Benzene, (1-methyldecyl)-     | 4.41        | 4.90        | 4.27        | 2.85        |
| Benzene, undecyl-             | 0.51        | 0.47        | 0.48        | 0.44        |
| Benzene, 1,3-didecyl-         | 2.16        | -           | -           | -           |
| Benzene, (1,1-dimethylnonyl)- | 0.96        | 0.83        | 0.82        | 0.76        |
| <b>Total</b>                  | <b>1.17</b> | <b>6.20</b> | <b>5.57</b> | <b>5.76</b> |

| Oxygenated compounds                  | Yield (wt%) |     |     |     |
|---------------------------------------|-------------|-----|-----|-----|
|                                       | 0 h         | 1 h | 2 h | 3 h |
| cis-7-Hexadecenoic acid               | 0.56        | -   | -   | -   |
| Octadecanoic acid                     | 0.76        | -   | -   | -   |
| 2(3H)-Furanone, dihydro-5-tetradecyl- | 0.67        | -   | -   | -   |
| <b>Total</b>                          | <b>1.99</b> | -   | -   | -   |

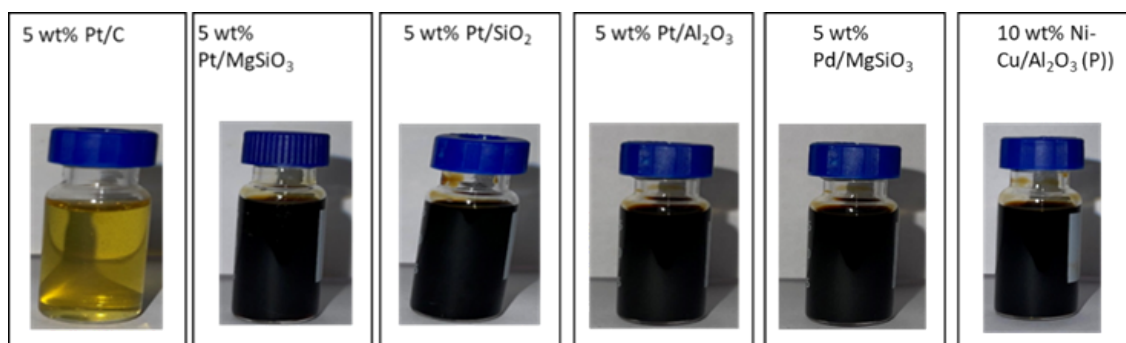

Figure S14: Appearance of oil products obtained from using different catalysts at 400 °C and catalyst/HRSO mass ratio of 0.2

Table S14: List of compounds in oil products obtained from using different catalysts at 400 °C and catalyst/HRSO mass ratio of 0.2

| <b>Alkanes</b>                               | Pt/C        | Pt/MgSiO <sub>3</sub> | Pt/SiO <sub>2</sub> | Pt/Al <sub>2</sub> O <sub>3</sub> | Pd/MgSiO <sub>3</sub> | NiCu/Al <sub>2</sub> O <sub>3</sub> |
|----------------------------------------------|-------------|-----------------------|---------------------|-----------------------------------|-----------------------|-------------------------------------|
| Heptane                                      | 1.22        | 1.90                  | 2.18                | 1.99                              | 0.22                  | 2.45                                |
| Octane                                       | 1.27        | 2.11                  | 2.34                | 2.10                              | 0.78                  | 2.69                                |
| Nonane                                       | 1.30        | 2.15                  | 2.24                | 2.12                              | 1.18                  | 2.60                                |
| Decane                                       | 1.30        | 2.19                  | 2.34                | 2.25                              | 1.46                  | 2.81                                |
| Undecane                                     | 1.35        | 2.42                  | 2.59                | 2.51                              | 1.78                  | 3.10                                |
| Dodecane                                     | 1.39        | 2.67                  | 3.17                | 3.00                              | 2.18                  | 3.44                                |
| Tridecane                                    | 1.42        | 2.11                  | 2.22                | 2.28                              | 1.84                  | 2.57                                |
| Tetradecane                                  | 1.45        | 1.70                  | 1.62                | 1.96                              | 1.28                  | 1.94                                |
| Pentadecane                                  | 6.52        | 7.73                  | 7.46                | 7.83                              | 5.86                  | 7.54                                |
| Hexadecane                                   | 1.43        | 2.02                  | 1.59                | 1.92                              | 1.47                  | 1.72                                |
| Pentadecane, 7-methyl-                       | -           | 4.29                  | 0.61                | 1.62                              | 2.14                  | 0.91                                |
| Cyclohexane, 1,5-diethyl-2,3-dimethyl-       | -           | -                     | 0.42                | -                                 | -                     | -                                   |
| Cyclopentane, 1-pentyl-2-propyl-             | -           | -                     | 0.69                | 0.51                              | 0.35                  | 0.60                                |
| Cyclodecane, octyl-                          | -           | -                     | 3.04                | -                                 | -                     | 2.02                                |
| Cyclohexane, 1,2-dimethyl-3-pentyl-4-propyl- | -           | -                     | 1.50                | -                                 | -                     | -                                   |
| Tetradecane, 5-methyl-                       | 0.72        | 1.31                  | -                   | 0.48                              | 0.65                  | -                                   |
| Tetradecane, 4-methyl-                       | 0.86        | 1.06                  | -                   | -                                 | 0.53                  | -                                   |
| Hexadecane, 2-methyl-                        | 2.84        | 1.28                  | -                   | -                                 | -                     | -                                   |
| Tetradecane, 3-methyl-                       | 1.76        | 1.54                  | -                   | -                                 | -                     | -                                   |
| Cyclohexadecane                              | -           | 0.74                  | -                   | -                                 | -                     | 1.05                                |
| 2,6,10-Trimethyltridecane                    | 2.07        | -                     | -                   | -                                 | -                     | -                                   |
| Decane, 2,5-dimethyl-                        | 0.75        | -                     | -                   | -                                 | -                     | -                                   |
| Undecane, 6-methyl-                          | -           | 1.33                  | -                   | 0.50                              | 0.70                  | -                                   |
| Dodecane, 4-methyl-                          | -           | -                     | -                   | 0.55                              | -                     | -                                   |
| 1,3-Dimethyl-(3,7-dimethyloctyl)cyclohexane  | -           | -                     | -                   | -                                 | -                     | 1.64                                |
| Heptadecane                                  | 60.6        | 55.49                 | 40.56               | 56.72                             | 20.21                 | 22.97                               |
| Cyclopentane, decyl-                         | 0.26        | -                     | 0.63                | 0.46                              | 0.58                  | -                                   |
| Cyclopentane, undecyl-                       | -           | -                     | -                   | -                                 | -                     | 1.71                                |
| Cyclohexane, undecyl-                        | -           | -                     | 0.90                | -                                 | 0.54                  | 2.14                                |
| 10-Methylnonadecane                          | -           | -                     | -                   | -                                 | -                     | 0.51                                |
| Cyclopentane, 1-pentyl-2-propyl-             | -           | -                     | 1.13                | -                                 | -                     | -                                   |
| Octadecane                                   | 1.81        | 1.44                  | 0.93                | 0.89                              | 0.83                  | 0.51                                |
| Nonadecane                                   | 1.54        | 2.19                  | 1.38                | 1.85                              | 1.28                  | 1.35                                |
| Eicosane                                     | 0.41        | 0.65                  | 0.51                | 0.64                              | 0.48                  | 0.55                                |
| <b>Total</b>                                 | <b>92.3</b> | <b>98.32</b>          | <b>80.04</b>        | <b>92.18</b>                      | <b>46.3</b>           | <b>66.82</b>                        |

**Alkenes**

|                    |   |   |   |             |             |             |
|--------------------|---|---|---|-------------|-------------|-------------|
| 1-Hexene           | - | - | - | -           | -           | -           |
| 2-Heptene          | - | - | - | -           | -           | 0.44        |
| 9-Octadecene, (E)- | - | - | - | 1.63        | -           | -           |
| 5-Octadecene, (E)- | - | - | - | -           | 0.94        | -           |
| 5-Eicosene, (E)-   | - | - | - | -           | -           | -           |
| <b>Total</b>       | - | - | - | <b>1.63</b> | <b>0.94</b> | <b>0.44</b> |

---

#### Aromatics

|                                           |             |             |            |             |             |             |
|-------------------------------------------|-------------|-------------|------------|-------------|-------------|-------------|
| Toluene                                   | -           | -           | -          | -           | -           | 0.15        |
| Benzene, (1-methyldecyl)-                 | 1.28        | 0.63        | 0.95       | 1.23        | -           | 0.17        |
| Benzene, (1,1-dimethylnonyl)-             | 1.81        | -           | -          | 1.37        | -           | -           |
| Benzene, undecyl-                         | 1.48        | 0.36        | 0.53       | 0.60        | 0.14        | 0.19        |
| Benzene, dodecyl-                         | -           | 0.68        | 0.82       | -           | 0.28        | -           |
| Benzene, 1,4-dimethyl-2-(2-methylpropyl)- | -           | -           | -          | -           | -           | -           |
| Benzene, (2-methyl-1-propenyl)-           | -           | -           | -          | -           | -           | -           |
| <b>Total</b>                              | <b>5.57</b> | <b>1.67</b> | <b>2.3</b> | <b>3.20</b> | <b>0.42</b> | <b>0.51</b> |

---

#### Oxygenates

|                     |   |   |   |             |             |             |
|---------------------|---|---|---|-------------|-------------|-------------|
| 1-Decanol, 2-hexyl- | - | - | - | 3.00        | 1.16        | 1.50        |
| 1-Hexadecanol       | - | - | - | -           | -           | -           |
| <b>Total</b>        | - | - | - | <b>3.00</b> | <b>1.16</b> | <b>1.50</b> |
